# Supplementary material
Source: PubMed Central journal article supplement (PMC4203309)
Supplement: NIHMS596802-supplement-1.pdf [file NIHMS596802-supplement-1.pdf]

**Supplemental Movie 1** Live imaging of PLN B cell uptake of labeled papain following footpad injection. A C57BL/6 mouse was adoptively transferred with  $5 \times 10^6$  CD21-cre \_tdTomato B cells and 24 h later, the recipient was anesthetized and the PLN was exposed for live imaging. AF488-papain was injected into the footpad at  $t=0$ , and serial 150  $\mu\text{m}$  image stacks were collected every 2 min for 60 min. Movie displayed is visualized as a 3 dimensional rendering, and corrected for movement in Volocity image analysis software. Blue indicates collagen, green indicates papain, and red indicates B cells

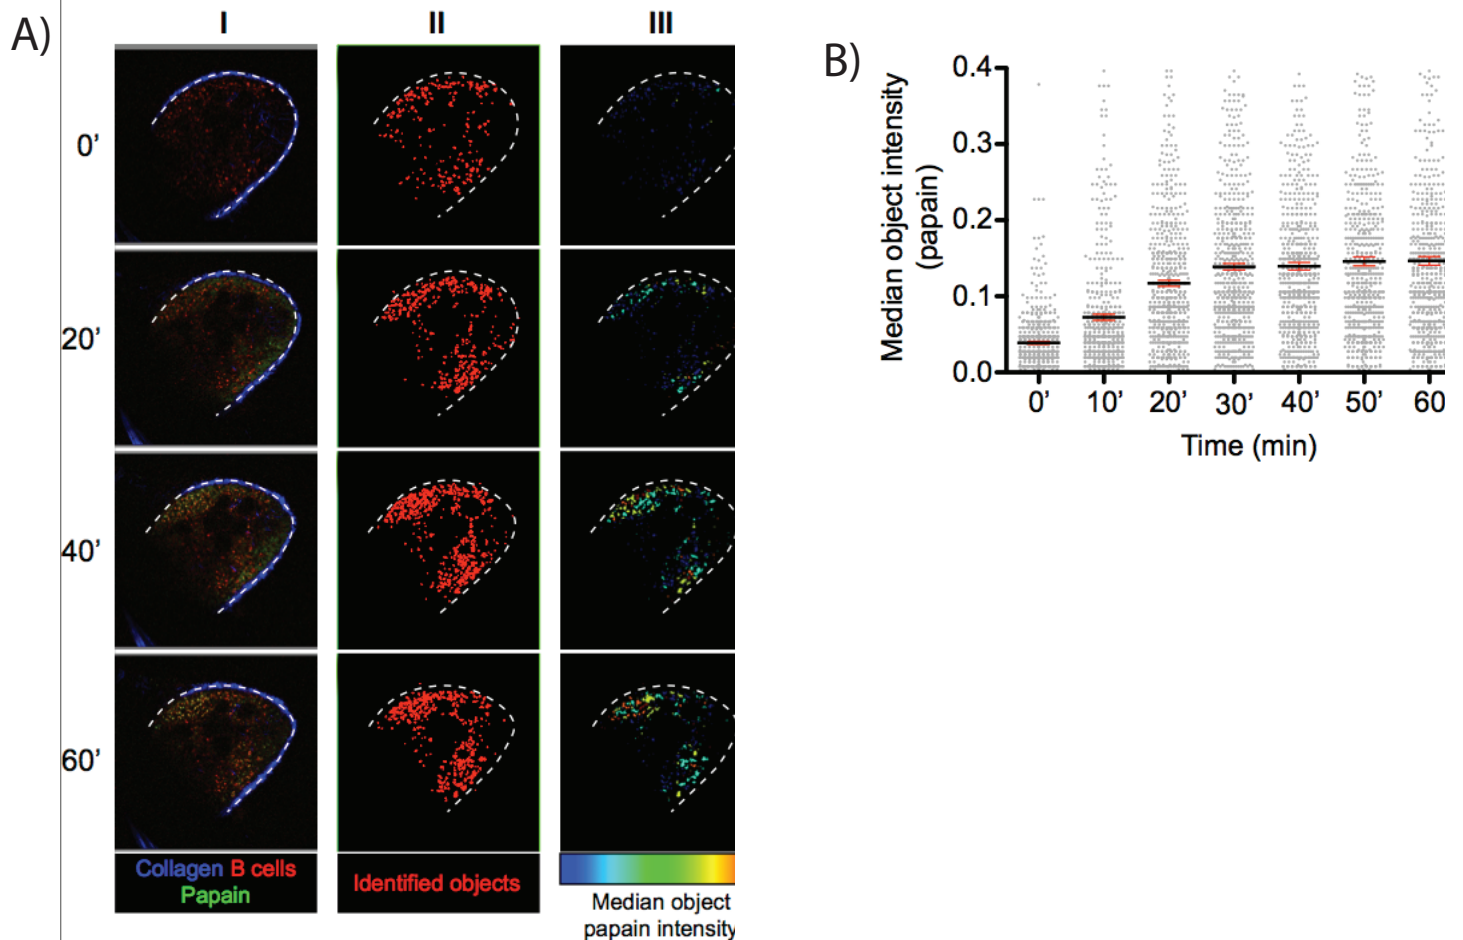

**FIGURE S1.** Intravital microscopy analysis of PLN B cell uptake of labeled papain following footpad injection. (A) B cells from CD21-cre\_tdTomato mice were adoptively transferred into C57BL/6 recipients, and the PLNs were live-imaged using IV-MPM. AF488-papain was injected into the footpad at  $t=0$  and 150  $\mu\text{m}$  image stacks (3  $\mu\text{m}$  steps) were captured every 2 min for 60 min. Example of CD21 positive object identification at the indicated time points at a selected z depth (60  $\mu\text{m}$ ). Raw images (I) were collected at each z-depth, and then processed by CellProfiler to identify CD21 positive objects (II). Identified objects were then assessed for papain colocalization, and median papain intensity was converted into visual heat-mapping data (III). (B) Median papain intensity from objects identified from (A) at the 60  $\mu\text{m}$  depth. Heavy lines indicate the median intensity of papain staining at each given time point and red bars indicate SD. ANOVA  $p < 0.0001$ .

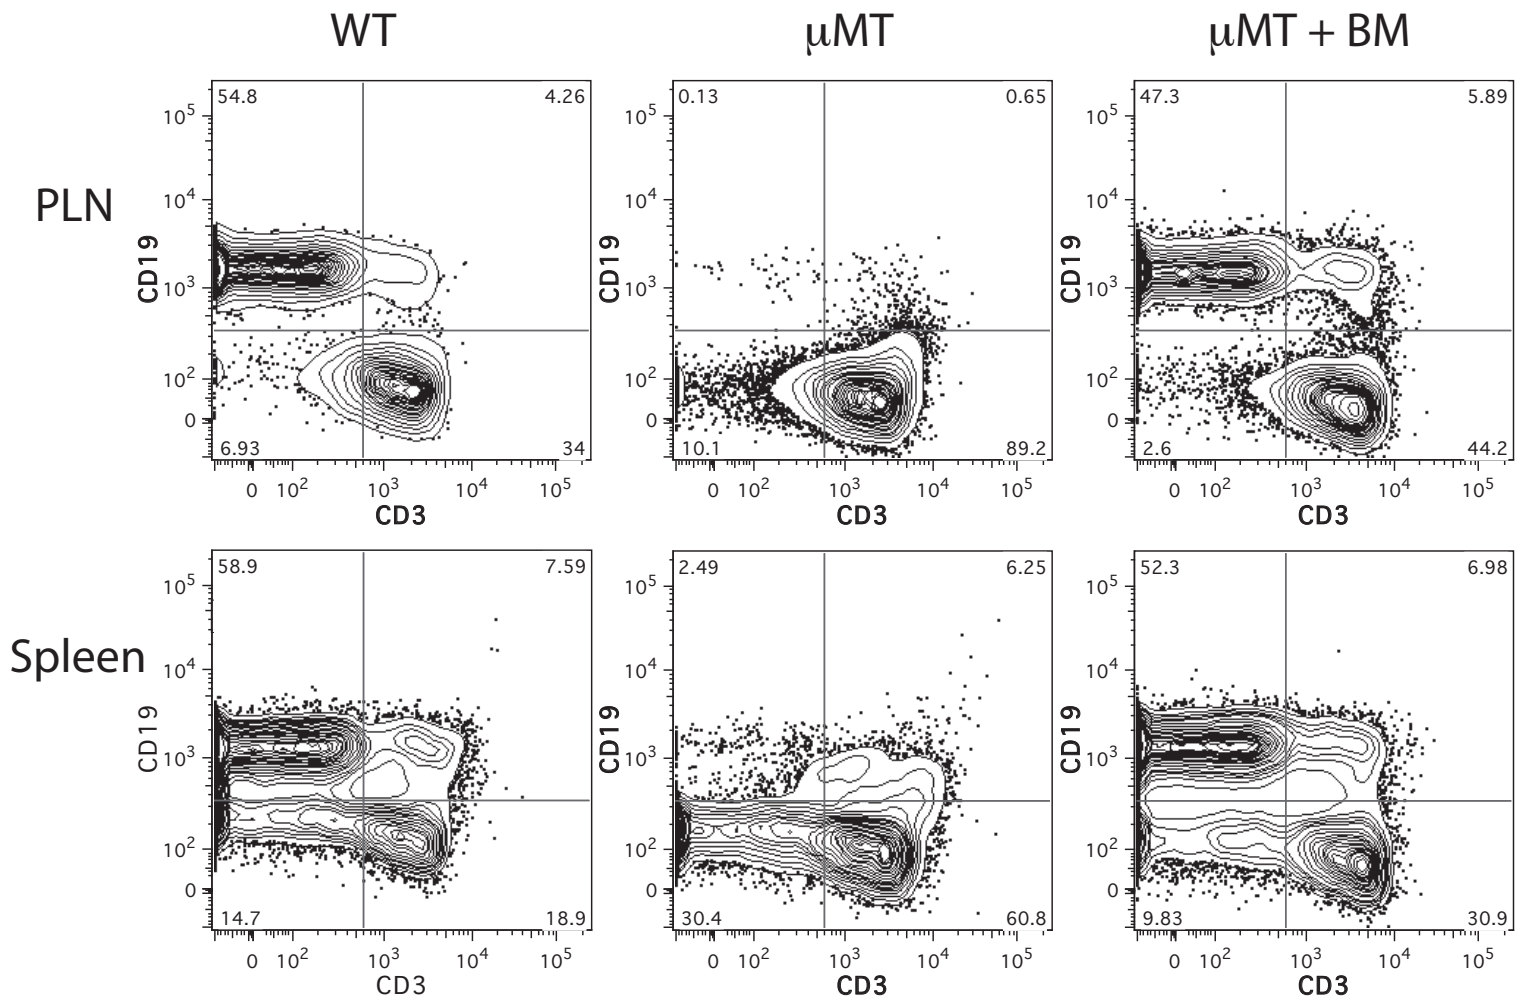

**FIGURE S2.** Assessment of B cell reconstitution following sublethal irradiation.  $\mu$ MT mice were sublethally irradiated and reconstituted with  $10^6$  WT BM cells. After 8 weeks mice were injected in the rear footpad with papain and the numbers of CD3<sup>+</sup> and CD19<sup>+</sup> were evaluated in the PLN and spleen. Reconstituted  $\mu$ MT mice were compared to age-matched WT and non-irradiated, non-reconstituted  $\mu$ MT mice. Representative FACS plots are shown. Sublethal irradiation followed by WT BM adoptive transfer was able to restore the B cell compartment in the LN and spleen to near-WT levels.

A)

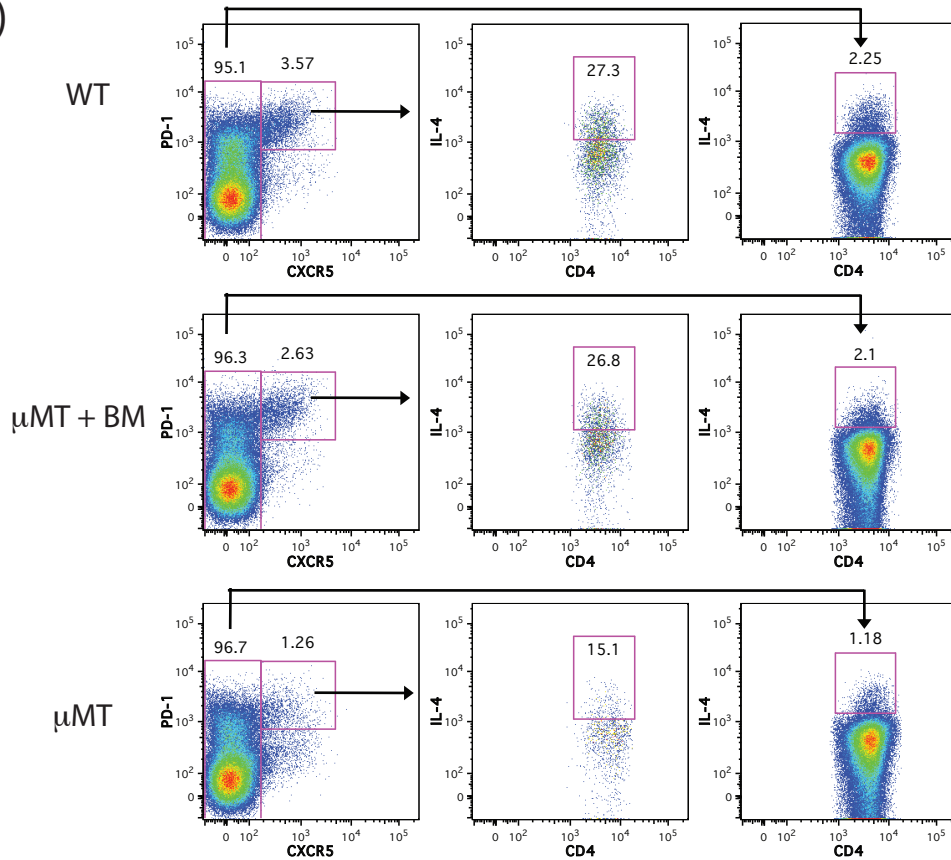

B)

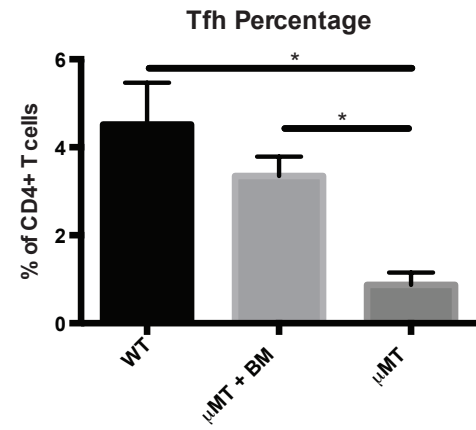

C)

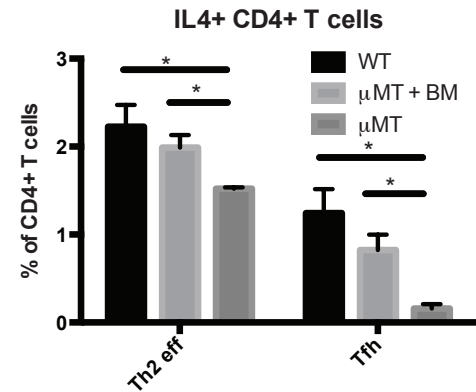

**FIGURE S3.** Analysis of the impact of B cell reconstitution on Tfh and Th2 responses.  $\mu$ MT mice were sublethally irradiated and reconstituted with  $10^6$  WT BM cells. After 8 weeks mice were injected in the rear footpad with papain and their immune responses were assessed after 5 d. Reconstituted  $\mu$ MT mice were compared to age matched WT and non-irradiated, non-reconstituted  $\mu$ MT mice. (A) Representative FACS plots showing the induction of Tfh (CXCR5<sup>hi</sup> PD1<sup>hi</sup>) and IL-4 expression by Tfh and conventional T cells (CXCR5<sup>lo</sup>) in WT, sublethally irradiated and reconstituted  $\mu$ MT, or non-irradiated, non-reconstituted  $\mu$ MT mice analyzed on d 5 post-immunization. (B) Quantification of total Tfh as a percentage of all CD4<sup>+</sup> T cells in WT, sublethally irradiated and BM-reconstituted  $\mu$ MT, or non-irradiated, non-reconstituted  $\mu$ MT mice. Bars indicate mean  $\pm$  SD of n=3 mice per group. (C) Comparison of effector Th2 cells (IL-4 + CXCR5<sup>lo</sup>) vs IL-4<sup>+</sup> Tfh cells (CXCR5<sup>hi</sup> PD-1<sup>hi</sup> IL-4<sup>+</sup>) as a mean percentage of all CD4<sup>+</sup> T cells in WT, sublethally irradiated and BM reconstituted  $\mu$ MT, or non-irradiated, non-reconstituted  $\mu$ MT mice. Bars indicate mean  $\pm$  SD of n=3 mice per group
